# Supplementary material
Source: publisher site journal article supplement (https://www.dovepress.com/get_supplementary_file.php?f=484303.xlsx)
Supplement: Supplementary file 1 [file get_supplementary_file.php]

## Sheet: Sheet1
Gene Symbol	Protein ID	Pvalue	Fold change	FDR	Regulation	Identified Proteins
APOC2	P02655	0.0019367	0.428489	0.596711	down	Apolipoprotein C-II OS=Homo sapiens OX=9606 GN=APOC2 PE=1 SV=1
E7EQB2	E7EQB2	0.0431088	0.501593	0.669816	down	Lactotransferrin (Fragment) OS=Homo sapiens OX=9606 GN=LTF PE=1 SV=1
A0A096LPE2	A0A096LPE2	0.00201485	0.513162	0.596711	down	SAA2-SAA4 readthrough OS=Homo sapiens OX=9606 GN=SAA2-SAA4 PE=3 SV=1
S10A8	P05109	0.0383606	0.586171	0.669816	down	Protein S100-A8 OS=Homo sapiens OX=9606 GN=S100A8 PE=1 SV=1
FA10	P00742	0.0288997	0.657633	0.669816	down	Coagulation factor X OS=Homo sapiens OX=9606 GN=F10 PE=1 SV=2
J3KQ32	J3KQ32	0.014586	0.660348	0.661265	down	Obg-like ATPase 1 OS=Homo sapiens OX=9606 GN=OLA1 PE=1 SV=1
SRP54	P61011	0.0195387	0.663828	0.669816	down	Signal recognition particle 54 kDa protein OS=Homo sapiens OX=9606 GN=SRP54 PE=1 SV=1
PSB1	P20618	0.0339279	0.693732	0.669816	down	Proteasome subunit beta type-1 OS=Homo sapiens OX=9606 GN=PSMB1 PE=1 SV=2
MCTS1	Q9ULC4	0.000469189	0.697201	0.56983	down	Malignant T-cell-amplified sequence 1 OS=Homo sapiens OX=9606 GN=MCTS1 PE=1 SV=1
ITIH4	Q14624	0.0357531	0.706825	0.669816	down	Inter-alpha-trypsin inhibitor heavy chain H4 OS=Homo sapiens OX=9606 GN=ITIH4 PE=1 SV=4
A0A024RA52	A0A024RA52	0.0128929	0.718276	0.661265	down	Proteasome subunit alpha type OS=Homo sapiens OX=9606 GN=PSMA2 PE=1 SV=1
ANXA3	P12429	0.0439912	0.724161	0.669816	down	Annexin A3 OS=Homo sapiens OX=9606 GN=ANXA3 PE=1 SV=3
B0YIW2	B0YIW2	0.0284303	0.726371	0.669816	down	Apolipoprotein C-III OS=Homo sapiens OX=9606 GN=APOC3 PE=1 SV=1
GRAN	P28676	0.0473176	0.7386	0.669816	down	Grancalcin OS=Homo sapiens OX=9606 GN=GCA PE=1 SV=2
C9JFR7	C9JFR7	0.0430233	0.738988	0.669816	down	Cytochrome c (Fragment) OS=Homo sapiens OX=9606 GN=CYCS PE=1 SV=1
UBE2N	P61088	0.0388837	0.767923	0.669816	down	Ubiquitin-conjugating enzyme E2 N OS=Homo sapiens OX=9606 GN=UBE2N PE=1 SV=1
PHP14	Q9NRX4	0.0498389	0.814795	0.669816	down	14 kDa phosphohistidine phosphatase OS=Homo sapiens OX=9606 GN=PHPT1 PE=1 SV=1
TCPG	P49368	0.0329031	0.829865	0.669816	down	T-complex protein 1 subunit gamma OS=Homo sapiens OX=9606 GN=CCT3 PE=1 SV=4
D6R938	D6R938	0.0442816	1.20356	0.669816	up	Calcium/calmodulin-dependent protein kinase OS=Homo sapiens OX=9606 GN=CAMK2D PE=1 SV=1
F2Z2Y4	F2Z2Y4	0.0439088	1.20453	0.669816	up	Pyridoxal kinase OS=Homo sapiens OX=9606 GN=PDXK PE=1 SV=1
SAMH1	Q9Y3Z3	0.0043544	1.2057	0.596711	up	Deoxynucleoside triphosphate triphosphohydrolase SAMHD1 OS=Homo sapiens OX=9606 GN=SAMHD1 PE=1 SV=2
A0A0A0MSA0	A0A0A0MSA0	0.0488478	1.20891	0.669816	up	Laminin subunit alpha-3 OS=Homo sapiens OX=9606 GN=LAMA3 PE=1 SV=1
PANK4	Q9NVE7	0.0460732	1.2124	0.669816	up	4'-phosphopantetheine phosphatase OS=Homo sapiens OX=9606 GN=PANK4 PE=1 SV=1
IF6	P56537	0.0221671	1.21778	0.669816	up	Eukaryotic translation initiation factor 6 OS=Homo sapiens OX=9606 GN=EIF6 PE=1 SV=1
I3L1R7	I3L1R7	0.000843131	1.21865	0.596711	up	Ethanolamine-phosphate cytidylyltransferase OS=Homo sapiens OX=9606 GN=PCYT2 PE=1 SV=1
A0A0J9YX66	A0A0J9YX66	0.0119097	1.2189	0.661265	up	CUGBP Elav-like family member 2 OS=Homo sapiens OX=9606 GN=CELF2 PE=1 SV=1
B7WPE2	B7WPE2	0.0487991	1.22424	0.669816	up	Echinoderm microtubule associated protein like 3, isoform CRA_e OS=Homo sapiens OX=9606 GN=EML3 PE=1 SV=1
PKHA5	Q9HAU0	0.0266591	1.22425	0.669816	up	Pleckstrin homology domain-containing family A member 5 OS=Homo sapiens OX=9606 GN=PLEKHA5 PE=1 SV=1
EPDR1	Q9UM22	0.0438811	1.2271	0.669816	up	Mammalian ependymin-related protein 1 OS=Homo sapiens OX=9606 GN=EPDR1 PE=1 SV=2
NDUF3	Q9BU61	0.0418983	1.22999	0.669816	up	NADH dehydrogenase [ubiquinone] 1 alpha subcomplex assembly factor 3 OS=Homo sapiens OX=9606 GN=NDUFAF3 PE=1 SV=1
ISLR	O14498	0.0038532	1.23385	0.596711	up	Immunoglobulin superfamily containing leucine-rich repeat protein OS=Homo sapiens OX=9606 GN=ISLR PE=2 SV=1
LRRF1	Q32MZ4	0.00570595	1.23509	0.596711	up	Leucine-rich repeat flightless-interacting protein 1 OS=Homo sapiens OX=9606 GN=LRRFIP1 PE=1 SV=2
A0A2R8Y7M0	A0A2R8Y7M0	0.0106337	1.23637	0.661265	up	TATA element modulatory factor OS=Homo sapiens OX=9606 GN=TMF1 PE=1 SV=1
H0YC42	H0YC42	0.041535	1.23969	0.669816	up	Uncharacterized protein OS=Homo sapiens OX=9606 PE=1 SV=2
CAD15	P55291	0.00432559	1.24126	0.596711	up	Cadherin-15 OS=Homo sapiens OX=9606 GN=CDH15 PE=1 SV=1
TM119	Q4V9L6	0.0499382	1.2496	0.669816	up	Transmembrane protein 119 OS=Homo sapiens OX=9606 GN=TMEM119 PE=1 SV=1
PFD5	Q99471	0.048362	1.25147	0.669816	up	Prefoldin subunit 5 OS=Homo sapiens OX=9606 GN=PFDN5 PE=1 SV=2
LG3BP	Q08380	0.00746129	1.25381	0.596711	up	Galectin-3-binding protein OS=Homo sapiens OX=9606 GN=LGALS3BP PE=1 SV=1
E9PDM8	E9PDM8	0.0217928	1.25426	0.669816	up	Protein transport protein Sec24D OS=Homo sapiens OX=9606 GN=SEC24D PE=1 SV=1
PLAC9	Q5JTB6	0.0183587	1.25588	0.669816	up	Placenta-specific protein 9 OS=Homo sapiens OX=9606 GN=PLAC9 PE=1 SV=1
A0A494C0X0	A0A494C0X0	0.0209996	1.25683	0.669816	up	Tubulin-folding cofactor B OS=Homo sapiens OX=9606 GN=TBCB PE=1 SV=1
A0A1W2PS24	A0A1W2PS24	0.0169147	1.25711	0.668402	up	HLA class I histocompatibility antigen, A alpha chain OS=Homo sapiens OX=9606 GN=HLA-A PE=1 SV=1
A0A8J9C4H3	A0A8J9C4H3	0.0384687	1.25929	0.669816	up	Golgin subfamily B member 1 OS=Homo sapiens OX=9606 GN=GOLGB1 PE=4 SV=1
RBBP7	Q16576	0.00786116	1.26118	0.596711	up	Histone-binding protein RBBP7 OS=Homo sapiens OX=9606 GN=RBBP7 PE=1 SV=1
NIT2	Q9NQR4	0.00303158	1.26445	0.596711	up	Omega-amidase NIT2 OS=Homo sapiens OX=9606 GN=NIT2 PE=1 SV=1
DDX3Y	O15523	0.00855607	1.26795	0.612683	up	ATP-dependent RNA helicase DDX3Y OS=Homo sapiens OX=9606 GN=DDX3Y PE=1 SV=2
A0A0G2JN29	A0A0G2JN29	0.0320735	1.27041	0.669816	up	Nodal modulator 1 OS=Homo sapiens OX=9606 GN=NOMO1 PE=1 SV=1
H0YJ97	H0YJ97	0.0159295	1.27492	0.665691	up	Thyroid receptor-interacting protein 11 (Fragment) OS=Homo sapiens OX=9606 GN=TRIP11 PE=1 SV=1
PMVK	Q15126	0.0153066	1.27646	0.665691	up	Phosphomevalonate kinase OS=Homo sapiens OX=9606 GN=PMVK PE=1 SV=3
A0A7I2V370	A0A7I2V370	0.03288	1.27718	0.669816	up	Catechol O-methyltransferase OS=Homo sapiens OX=9606 GN=COMT PE=1 SV=1
STX7	O15400	0.0146229	1.27813	0.661265	up	Syntaxin-7 OS=Homo sapiens OX=9606 GN=STX7 PE=1 SV=4
LMAN1	P49257	0.0337375	1.28201	0.669816	up	Protein ERGIC-53 OS=Homo sapiens OX=9606 GN=LMAN1 PE=1 SV=2
TRBP2	Q15633	0.0421087	1.28218	0.669816	up	RISC-loading complex subunit TARBP2 OS=Homo sapiens OX=9606 GN=TARBP2 PE=1 SV=3
A0A2R8Y5D3	A0A2R8Y5D3	0.00384379	1.28231	0.596711	up	DNA-directed RNA polymerases I and III subunit RPAC1 OS=Homo sapiens OX=9606 GN=POLR1C PE=1 SV=1
NUP62	P37198	0.0213238	1.29	0.669816	up	Nuclear pore glycoprotein p62 OS=Homo sapiens OX=9606 GN=NUP62 PE=1 SV=3
H7C0E5	H7C0E5	0.0319733	1.29043	0.669816	up	Zinc finger protein ZPR1 (Fragment) OS=Homo sapiens OX=9606 GN=ZPR1 PE=1 SV=1
RBBP4	Q09028	0.00720796	1.29839	0.596711	up	Histone-binding protein RBBP4 OS=Homo sapiens OX=9606 GN=RBBP4 PE=1 SV=3
PEX19	P40855	0.0147008	1.30033	0.661265	up	Peroxisomal biogenesis factor 19 OS=Homo sapiens OX=9606 GN=PEX19 PE=1 SV=1
EMIL1	Q9Y6C2	0.0198588	1.3082	0.669816	up	EMILIN-1 OS=Homo sapiens OX=9606 GN=EMILIN1 PE=1 SV=3
QKI	Q96PU8	0.0457818	1.30958	0.669816	up	Protein quaking OS=Homo sapiens OX=9606 GN=QKI PE=1 SV=1
J3KTJ6	J3KTJ6	0.0171848	1.31128	0.668402	up	Gamma-soluble NSF attachment protein (Fragment) OS=Homo sapiens OX=9606 GN=NAPG PE=1 SV=3
A0A3B3IUA7	A0A3B3IUA7	0.0146459	1.31224	0.661265	up	E3 ubiquitin/ISG15 ligase TRIM25 OS=Homo sapiens OX=9606 GN=TRIM25 PE=1 SV=1
A0A804HKH9	A0A804HKH9	0.0326375	1.31368	0.669816	up	Peptidylprolyl isomerase (Fragment) OS=Homo sapiens OX=9606 GN=AIP PE=1 SV=1
A0A8C8KBL6	A0A8C8KBL6	0.0423867	1.31426	0.669816	up	Integrin alpha-6 OS=Homo sapiens OX=9606 GN=ITGA6 PE=1 SV=1
E41L2	O43491	0.00449155	1.31649	0.596711	up	Band 4.1-like protein 2 OS=Homo sapiens OX=9606 GN=EPB41L2 PE=1 SV=1
KANK2	Q63ZY3	0.0447107	1.32054	0.669816	up	KN motif and ankyrin repeat domain-containing protein 2 OS=Homo sapiens OX=9606 GN=KANK2 PE=1 SV=1
DAB2	P98082	0.0207086	1.32145	0.669816	up	Disabled homolog 2 OS=Homo sapiens OX=9606 GN=DAB2 PE=1 SV=3
RAB9A	P51151	0.031004	1.32433	0.669816	up	Ras-related protein Rab-9A OS=Homo sapiens OX=9606 GN=RAB9A PE=1 SV=1
CAP2	P40123	0.0208932	1.32533	0.669816	up	Adenylyl cyclase-associated protein 2 OS=Homo sapiens OX=9606 GN=CAP2 PE=1 SV=1
A0A087WXM8	A0A087WXM8	0.0268006	1.32702	0.669816	up	Basal cell adhesion molecule OS=Homo sapiens OX=9606 GN=BCAM PE=1 SV=1
4ET	Q9NRA8	0.0314152	1.3273	0.669816	up	Eukaryotic translation initiation factor 4E transporter OS=Homo sapiens OX=9606 GN=EIF4ENIF1 PE=1 SV=2
UGGG1	Q9NYU2	0.0220836	1.32797	0.669816	up	UDP-glucose:glycoprotein glucosyltransferase 1 OS=Homo sapiens OX=9606 GN=UGGT1 PE=1 SV=3
ITAV	P06756	0.0389026	1.32811	0.669816	up	Integrin alpha-V OS=Homo sapiens OX=9606 GN=ITGAV PE=1 SV=2
COR1B	Q9BR76	0.00857605	1.33075	0.612683	up	Coronin-1B OS=Homo sapiens OX=9606 GN=CORO1B PE=1 SV=1
INO1	Q9NPH2	0.00919539	1.33092	0.63816	up	Inositol-3-phosphate synthase 1 OS=Homo sapiens OX=9606 GN=ISYNA1 PE=1 SV=1
ITA1	P56199	0.0485472	1.33366	0.669816	up	Integrin alpha-1 OS=Homo sapiens OX=9606 GN=ITGA1 PE=1 SV=2
PTN23	Q9H3S7	0.00482571	1.33422	0.596711	up	Tyrosine-protein phosphatase non-receptor type 23 OS=Homo sapiens OX=9606 GN=PTPN23 PE=1 SV=1
B4DLR2	B4DLR2	0.0428737	1.33468	0.669816	up	Prolyl endopeptidase FAP OS=Homo sapiens OX=9606 GN=FAP PE=1 SV=1
ADPRS	Q9NX46	0.0263179	1.33705	0.669816	up	ADP-ribosylhydrolase ARH3 OS=Homo sapiens OX=9606 GN=ADPRS PE=1 SV=1
NEST	P48681	0.00753414	1.33787	0.596711	up	Nestin OS=Homo sapiens OX=9606 GN=NES PE=1 SV=2
SON	P18583	0.0421547	1.34129	0.669816	up	Protein SON OS=Homo sapiens OX=9606 GN=SON PE=1 SV=4
PUR1	Q06203	0.00171877	1.34254	0.596711	up	Amidophosphoribosyltransferase OS=Homo sapiens OX=9606 GN=PPAT PE=1 SV=1
A0A7P0MQR8	A0A7P0MQR8	0.0100326	1.34282	0.659455	up	Microtubule-actin cross-linking factor 1, isoforms 6/7 OS=Homo sapiens OX=9606 GN=MACF1 PE=1 SV=1
A0A1W2PQU7	A0A1W2PQU7	0.0371854	1.35113	0.669816	up	Glial fibrillary acidic protein (Fragment) OS=Homo sapiens OX=9606 GN=GFAP PE=1 SV=1
NAGAB	P17050	0.0375805	1.35993	0.669816	up	Alpha-N-acetylgalactosaminidase OS=Homo sapiens OX=9606 GN=NAGA PE=1 SV=2
VCAM1	P19320	0.0164436	1.36282	0.665691	up	Vascular cell adhesion protein 1 OS=Homo sapiens OX=9606 GN=VCAM1 PE=1 SV=1
A0A096LNH5	A0A096LNH5	0.0385502	1.3656	0.669816	up	Putative glutamine amidotransferase-like class 1 domain-containing protein 3B, mitochondrial OS=Homo sapiens OX=9606 GN=GATD3B PE=1 SV=1
3HAO	P46952	0.000193871	1.37224	0.470913	up	3-hydroxyanthranilate 3,4-dioxygenase OS=Homo sapiens OX=9606 GN=HAAO PE=1 SV=2
RTCB	Q9Y3I0	0.040524	1.3741	0.669816	up	RNA-splicing ligase RtcB homolog OS=Homo sapiens OX=9606 GN=RTCB PE=1 SV=1
IPYR2	Q9H2U2	0.0124572	1.3754	0.661265	up	Inorganic pyrophosphatase 2, mitochondrial OS=Homo sapiens OX=9606 GN=PPA2 PE=1 SV=2
PDLI5	Q96HC4	0.0445225	1.37551	0.669816	up	PDZ and LIM domain protein 5 OS=Homo sapiens OX=9606 GN=PDLIM5 PE=1 SV=5
GRAP1	Q4V328	0.0199696	1.38655	0.669816	up	GRIP1-associated protein 1 OS=Homo sapiens OX=9606 GN=GRIPAP1 PE=1 SV=2
SUOX	P51687	0.0217733	1.38724	0.669816	up	Sulfite oxidase, mitochondrial OS=Homo sapiens OX=9606 GN=SUOX PE=1 SV=2
PECA1	P16284	0.00772605	1.39526	0.596711	up	Platelet endothelial cell adhesion molecule OS=Homo sapiens OX=9606 GN=PECAM1 PE=1 SV=2
SLK	Q9H2G2	0.0285653	1.39835	0.669816	up	STE20-like serine/threonine-protein kinase OS=Homo sapiens OX=9606 GN=SLK PE=1 SV=1
CSK	P41240	0.04077	1.39951	0.669816	up	Tyrosine-protein kinase CSK OS=Homo sapiens OX=9606 GN=CSK PE=1 SV=1
LRP1	Q07954	0.0156808	1.40865	0.665691	up	Prolow-density lipoprotein receptor-related protein 1 OS=Homo sapiens OX=9606 GN=LRP1 PE=1 SV=2
ACADV	P49748	0.00579824	1.41161	0.596711	up	Very long-chain specific acyl-CoA dehydrogenase, mitochondrial OS=Homo sapiens OX=9606 GN=ACADVL PE=1 SV=1
AIF1	P55008	0.0140793	1.41654	0.661265	up	Allograft inflammatory factor 1 OS=Homo sapiens OX=9606 GN=AIF1 PE=1 SV=1
KTN1	Q86UP2	0.0210916	1.41677	0.669816	up	Kinectin OS=Homo sapiens OX=9606 GN=KTN1 PE=1 SV=1
SCRN1	Q12765	0.0318925	1.42079	0.669816	up	Secernin-1 OS=Homo sapiens OX=9606 GN=SCRN1 PE=1 SV=2
H0Y8R1	H0Y8R1	0.0345873	1.42421	0.669816	up	G-rich sequence factor 1 (Fragment) OS=Homo sapiens OX=9606 GN=GRSF1 PE=1 SV=1
A0A804HII9	A0A804HII9	0.0297928	1.42995	0.669816	up	Alpha-actinin-1 OS=Homo sapiens OX=9606 GN=ACTN1 PE=1 SV=1
FUBP3	Q96I24	0.0477683	1.43241	0.669816	up	Far upstream element-binding protein 3 OS=Homo sapiens OX=9606 GN=FUBP3 PE=1 SV=2
B4DVD8	B4DVD8	0.0133074	1.4389	0.661265	up	Caspase-1 OS=Homo sapiens OX=9606 GN=CASP1 PE=1 SV=1
MAP1B	P46821	0.0350427	1.43898	0.669816	up	Microtubule-associated protein 1B OS=Homo sapiens OX=9606 GN=MAP1B PE=1 SV=2
T22D1	Q15714	0.039549	1.44002	0.669816	up	TSC22 domain family protein 1 OS=Homo sapiens OX=9606 GN=TSC22D1 PE=1 SV=3
SUSD2	Q9UGT4	0.0024997	1.45155	0.596711	up	Sushi domain-containing protein 2 OS=Homo sapiens OX=9606 GN=SUSD2 PE=1 SV=1
ARL3	P36405	0.0269212	1.45182	0.669816	up	ADP-ribosylation factor-like protein 3 OS=Homo sapiens OX=9606 GN=ARL3 PE=1 SV=2
A0A0G2JH46	A0A0G2JH46	0.0445804	1.46265	0.669816	up	HLA class II histocompatibility antigen, DR alpha chain OS=Homo sapiens OX=9606 GN=HLA-DRA PE=1 SV=1
COL12	Q5KU26	0.0100452	1.46568	0.659455	up	Collectin-12 OS=Homo sapiens OX=9606 GN=COLEC12 PE=1 SV=3
GALK1	P51570	0.00638687	1.46677	0.596711	up	Galactokinase OS=Homo sapiens OX=9606 GN=GALK1 PE=1 SV=1
ADX	P10109	0.0408427	1.46748	0.669816	up	Adrenodoxin, mitochondrial OS=Homo sapiens OX=9606 GN=FDX1 PE=1 SV=1
FCGRN	P55899	0.0246336	1.47334	0.669816	up	IgG receptor FcRn large subunit p51 OS=Homo sapiens OX=9606 GN=FCGRT PE=1 SV=1
CTBP2	P56545	0.025163	1.47668	0.669816	up	C-terminal-binding protein 2 OS=Homo sapiens OX=9606 GN=CTBP2 PE=1 SV=1
A0A087WX59	A0A087WX59	0.00432461	1.48666	0.596711	up	Proteasomal ubiquitin receptor ADRM1 OS=Homo sapiens OX=9606 GN=ADRM1 PE=1 SV=1
NCK1	P16333	0.024793	1.49201	0.669816	up	Cytoplasmic protein NCK1 OS=Homo sapiens OX=9606 GN=NCK1 PE=1 SV=1
PAXX	Q9BUH6	0.0327439	1.49327	0.669816	up	Protein PAXX OS=Homo sapiens OX=9606 GN=PAXX PE=1 SV=2
PRDX4	Q13162	0.0246695	1.49435	0.669816	up	Peroxiredoxin-4 OS=Homo sapiens OX=9606 GN=PRDX4 PE=1 SV=1
A0A8I5KU76	A0A8I5KU76	0.0142949	1.49935	0.661265	up	Endoplasmic reticulum resident protein 44 OS=Homo sapiens OX=9606 GN=ERP44 PE=1 SV=1
A0A590UJX5	A0A590UJX5	0.0259461	1.50472	0.669816	up	AMP deaminase 2 OS=Homo sapiens OX=9606 GN=AMPD2 PE=1 SV=2
PODXL	O00592	0.0122549	1.51476	0.661265	up	Podocalyxin OS=Homo sapiens OX=9606 GN=PODXL PE=1 SV=2
A0A804HK76	A0A804HK76	0.00617601	1.51939	0.596711	up	Filamin-B OS=Homo sapiens OX=9606 GN=FLNB PE=1 SV=1
A0A087WWD4	A0A087WWD4	0.0296897	1.53656	0.669816	up	Neural cell adhesion molecule 1 OS=Homo sapiens OX=9606 GN=NCAM1 PE=1 SV=1
MARCS	P29966	0.0438987	1.53861	0.669816	up	Myristoylated alanine-rich C-kinase substrate OS=Homo sapiens OX=9606 GN=MARCKS PE=1 SV=4
MUC18	P43121	0.0163865	1.54943	0.665691	up	Cell surface glycoprotein MUC18 OS=Homo sapiens OX=9606 GN=MCAM PE=1 SV=2
D6R956	D6R956	0.00169214	1.55202	0.596711	up	Ubiquitin carboxyl-terminal hydrolase OS=Homo sapiens OX=9606 GN=UCHL1 PE=1 SV=1
LGMN	Q99538	0.00641667	1.56893	0.596711	up	Legumain OS=Homo sapiens OX=9606 GN=LGMN PE=1 SV=1
E7EX60	E7EX60	0.046812	1.59434	0.669816	up	Neuropilin-1 OS=Homo sapiens OX=9606 GN=NRP1 PE=1 SV=1
CAD11	P55287	0.00178166	1.59547	0.596711	up	Cadherin-11 OS=Homo sapiens OX=9606 GN=CDH11 PE=1 SV=2
E9PIK4	E9PIK4	0.0379856	1.60748	0.669816	up	Tumor protein p53-inducible protein 11 OS=Homo sapiens OX=9606 GN=TP53I11 PE=1 SV=1
RAI14	Q9P0K7	0.024617	1.61101	0.669816	up	Ankycorbin OS=Homo sapiens OX=9606 GN=RAI14 PE=1 SV=2
TIM10	P62072	0.0315537	1.62941	0.669816	up	Mitochondrial import inner membrane translocase subunit Tim10 OS=Homo sapiens OX=9606 GN=TIMM10 PE=1 SV=1
CBPQ	Q9Y646	0.0407829	1.63145	0.669816	up	Carboxypeptidase Q OS=Homo sapiens OX=9606 GN=CPQ PE=1 SV=1
A0A0D9SF54	A0A0D9SF54	0.048374	1.63899	0.669816	up	Spectrin alpha chain, non-erythrocytic 1 OS=Homo sapiens OX=9606 GN=SPTAN1 PE=1 SV=1
C163A	Q86VB7	0.0126742	1.65531	0.661265	up	Scavenger receptor cysteine-rich type 1 protein M130 OS=Homo sapiens OX=9606 GN=CD163 PE=1 SV=2
TENA	P24821	0.00572587	1.66024	0.596711	up	Tenascin OS=Homo sapiens OX=9606 GN=TNC PE=1 SV=3
CO4A2	P08572	0.00285173	1.67818	0.596711	up	Collagen alpha-2(IV) chain OS=Homo sapiens OX=9606 GN=COL4A2 PE=1 SV=4
MRC1	P22897	0.0126703	1.71962	0.661265	up	Macrophage mannose receptor 1 OS=Homo sapiens OX=9606 GN=MRC1 PE=1 SV=1
ITA9	Q13797	0.0173361	1.76394	0.668402	up	Integrin alpha-9 OS=Homo sapiens OX=9606 GN=ITGA9 PE=1 SV=2
A0A7I2V440	A0A7I2V440	0.0317217	1.80254	0.669816	up	Cathepsin B OS=Homo sapiens OX=9606 GN=CTSB PE=1 SV=1
AL1A3	P47895	0.0429335	1.88872	0.669816	up	Aldehyde dehydrogenase family 1 member A3 OS=Homo sapiens OX=9606 GN=ALDH1A3 PE=1 SV=2
DDAH2	O95865	0.049441	1.93308	0.669816	up	N(G),N(G)-dimethylarginine dimethylaminohydrolase 2 OS=Homo sapiens OX=9606 GN=DDAH2 PE=1 SV=1
EMIL2	Q9BXX0	0.012466	1.97852	0.661265	up	EMILIN-2 OS=Homo sapiens OX=9606 GN=EMILIN2 PE=1 SV=3
H0YAE9	H0YAE9	0.0369185	1.98412	0.669816	up	Uncharacterized protein (Fragment) OS=Homo sapiens OX=9606 PE=3 SV=1
CO4A1	P02462	0.00576854	2.17567	0.596711	up	Collagen alpha-1(IV) chain OS=Homo sapiens OX=9606 GN=COL4A1 PE=1 SV=4
J3QLE5	J3QLE5	0.0268947	2.23882	0.669816	up	Small nuclear ribonucleoprotein-associated protein N (Fragment) OS=Homo sapiens OX=9606 GN=SNRPN PE=1 SV=1
